# Supplementary material for: El catalanisme i l'Estat. La lluita parlamentaria per l'autonomia (1898-1917)
Source: MDPI journal article supplement (doi:10.3390/ijms23020660), 1993-01-01
Supplement: s1 [file s1]

## Supplementary data

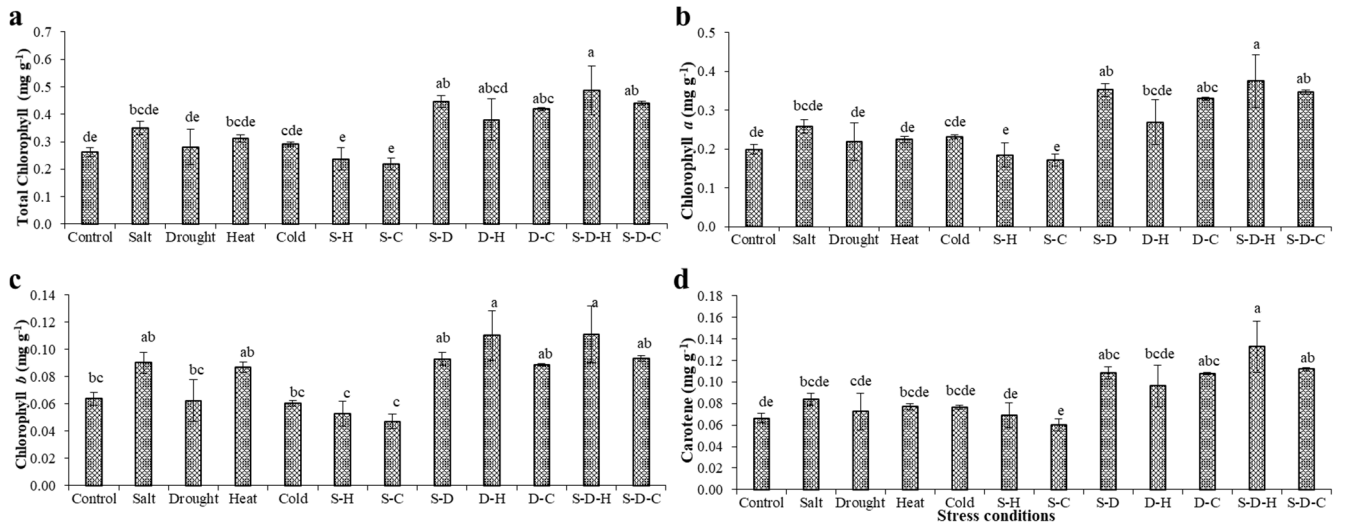

**Supplementary Figure S1.** Estimation of (a) total chlorophyll ( $\text{mg g}^{-1}$  FW), (b) chlorophyll *a* ( $\text{mg g}^{-1}$  FW), (c) chlorophyll *b* ( $\text{mg g}^{-1}$  FW), and (d) total carotene content ( $\text{mg g}^{-1}$  FW) in peanut plants treated with different individual and combined stresses (S-D: salinity and drought, S-H: salinity and heat, S-C: salinity and cold, D-H: drought and heat, D-C: drought and cold, S-D-H: salinity, drought, and heat, and S-D-C: salinity, drought, and cold). Data are shown as mean  $\pm$  SE, and different letters indicate significant differences at  $p < 0.05$ .

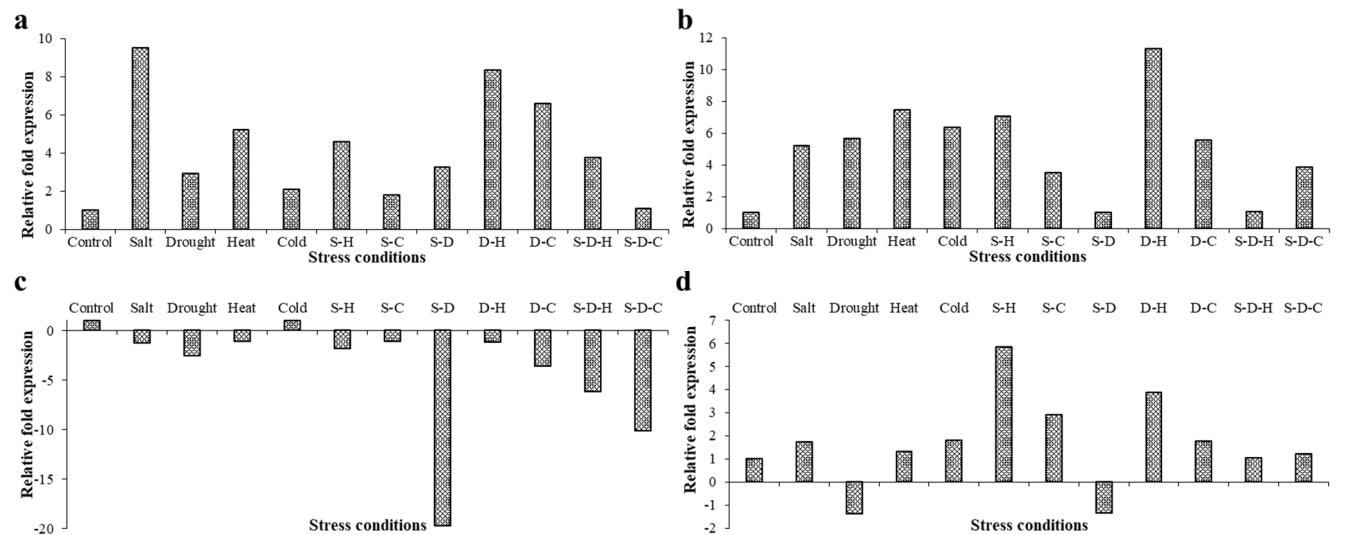

**Supplementary Figure S2.** Transcript expression analysis of genes encoding antioxidant enzymes. Estimation of relative fold expression of genes encoding for (a) superoxide dismutase (SOD), (b) ascorbate peroxidase (APX), (c) catalase (CAT), and (d) glutathione reductase (GR) antioxidant enzymes in peanut plants treated with different individual and combined stresses (S-D: salinity and drought, S-H: salinity and heat, S-C: salinity and cold, D-H: drought and heat, D-C: drought and cold, S-D-H: salinity, drought, and heat, and S-D-C: salinity, drought, and cold). Data are normalized with the fold expression of a housekeeping gene (actin).



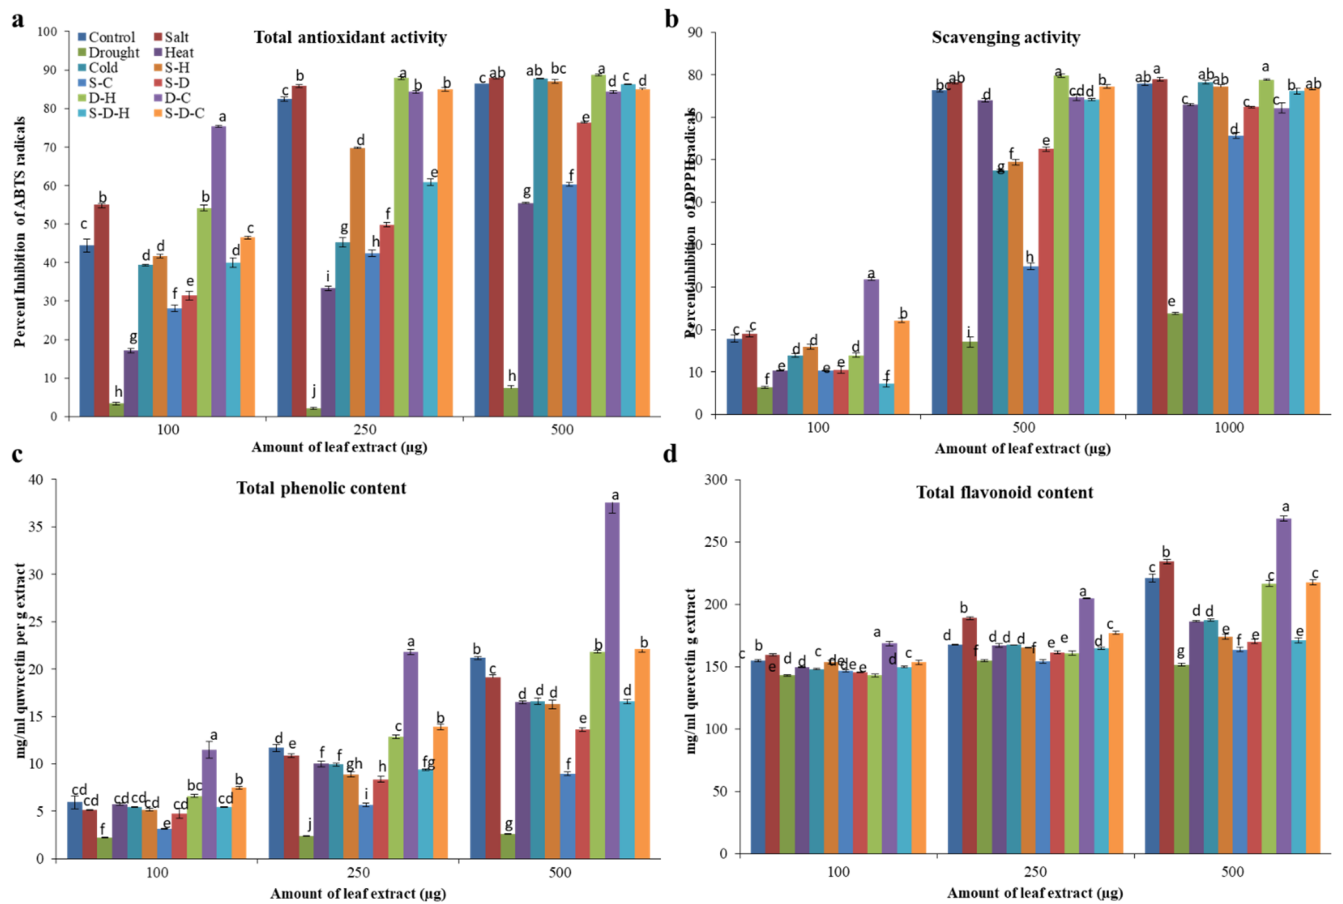

**Supplementary Figure S3.** Estimation of (a) total antioxidant activity, (b) scavenging activity, (c) total phenolics content, and (d) total flavonoid contents in peanut plants treated with different individual and combined stresses (S-D: salinity and drought, S-H: salinity and heat, S-C: salinity and cold, D-H: drought and heat, D-C: drought and cold, S-D-H: salinity, drought, and heat, and S-D-C: salinity, drought, and cold). Data are shown as mean  $\pm$  SE, and different letters indicate significant differences at  $p < 0.05$ .



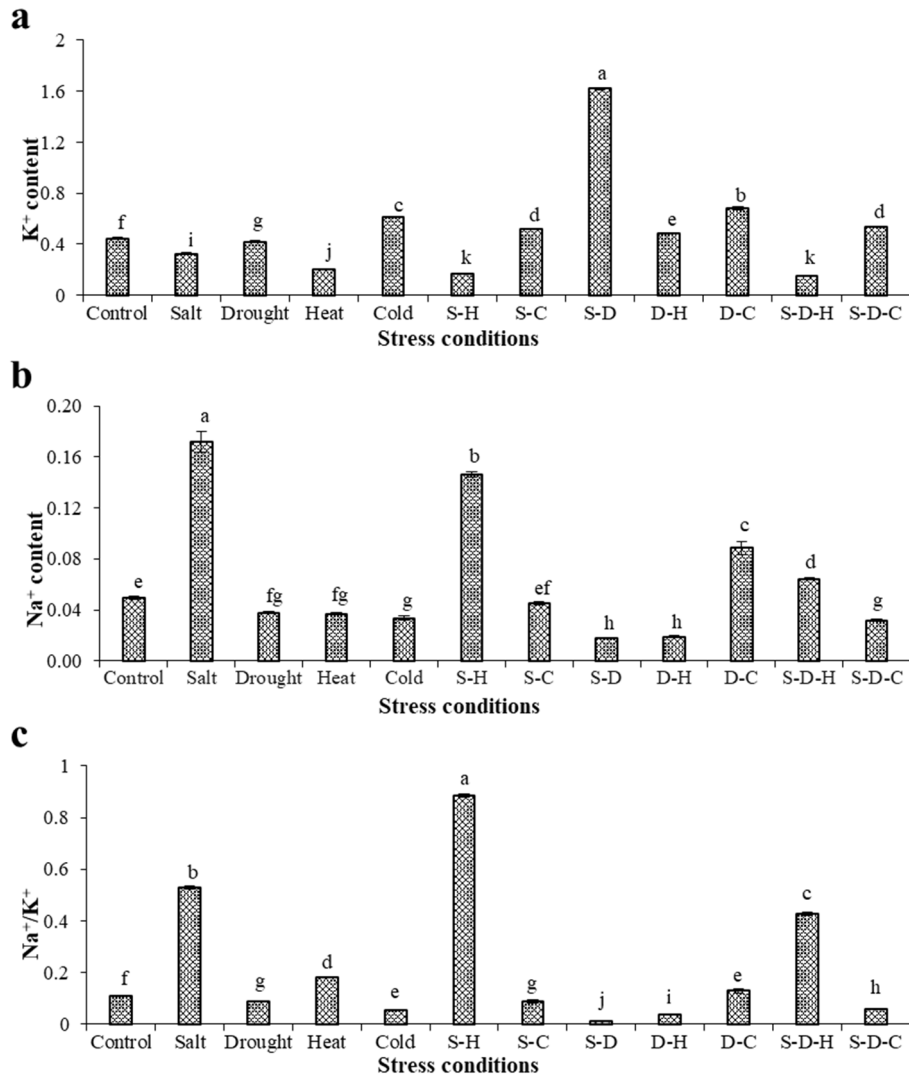

**Supplementary Figure S4.** Ion content analysis. Estimation of activity of (a) K<sup>+</sup> content (wt%), (b) Na<sup>+</sup> content (wt%), and (c) Na<sup>+</sup>/K<sup>+</sup> ratio in peanut plants treated with different individual stresses and combined stresses (S-D: salinity and drought, S-H: salinity and heat, S-C: salinity and cold, D-H: drought and heat, D-C: drought and cold, S-D-H: salinity, drought, and heat, and S-D-C: salinity, drought, and cold). Data are shown as mean  $\pm$  SE, and different letters indicate significant differences at  $p < 0.05$ .







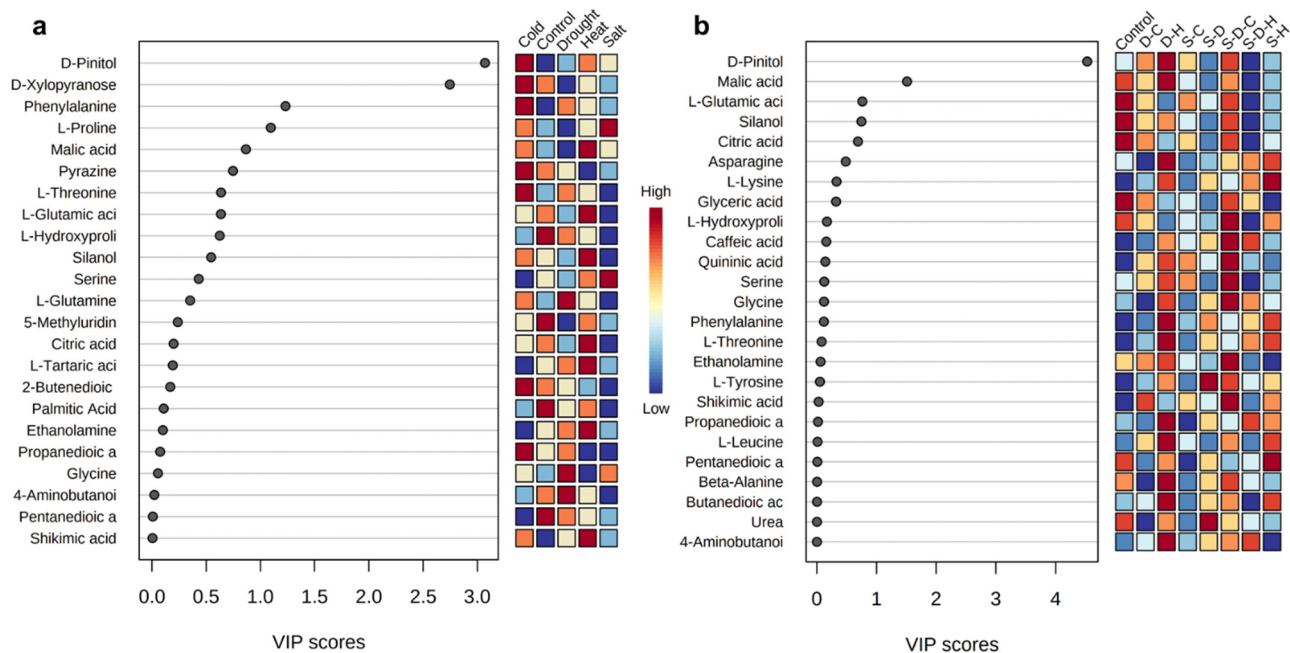

**Supplementary Figure S6.** Partial least square discriminant analysis (PLSDA) of selected metabolites in peanut plants treated with (a) individual and (b) combined stresses.

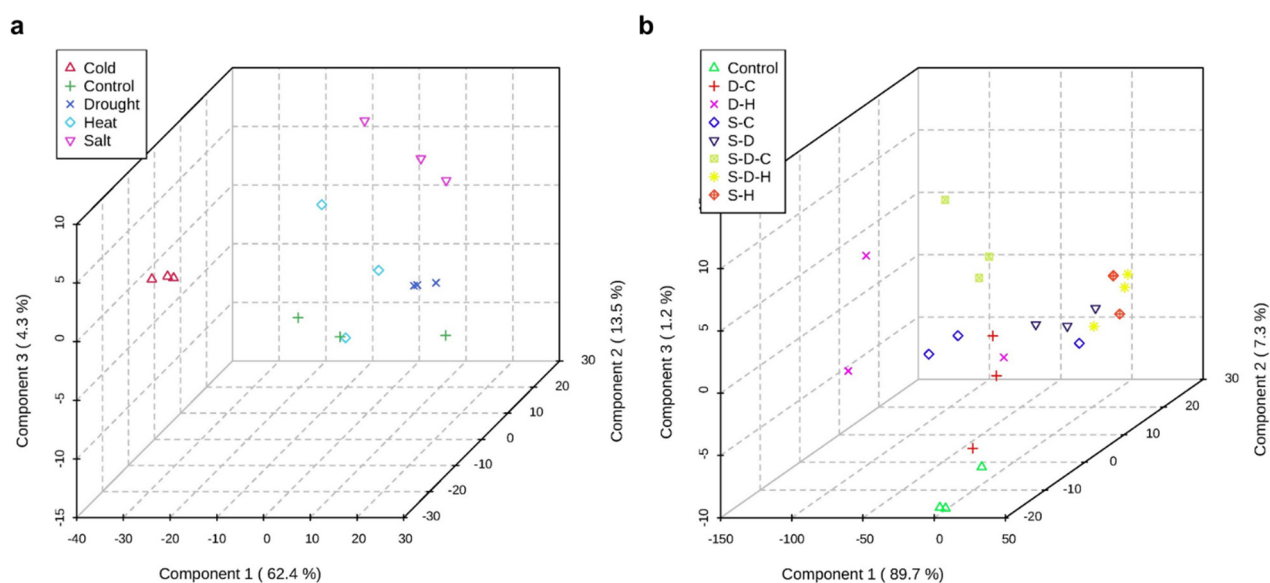

**Supplementary Figure S7.** 3D score plot between selected principal components for (a) individual and (b) combined stresses.



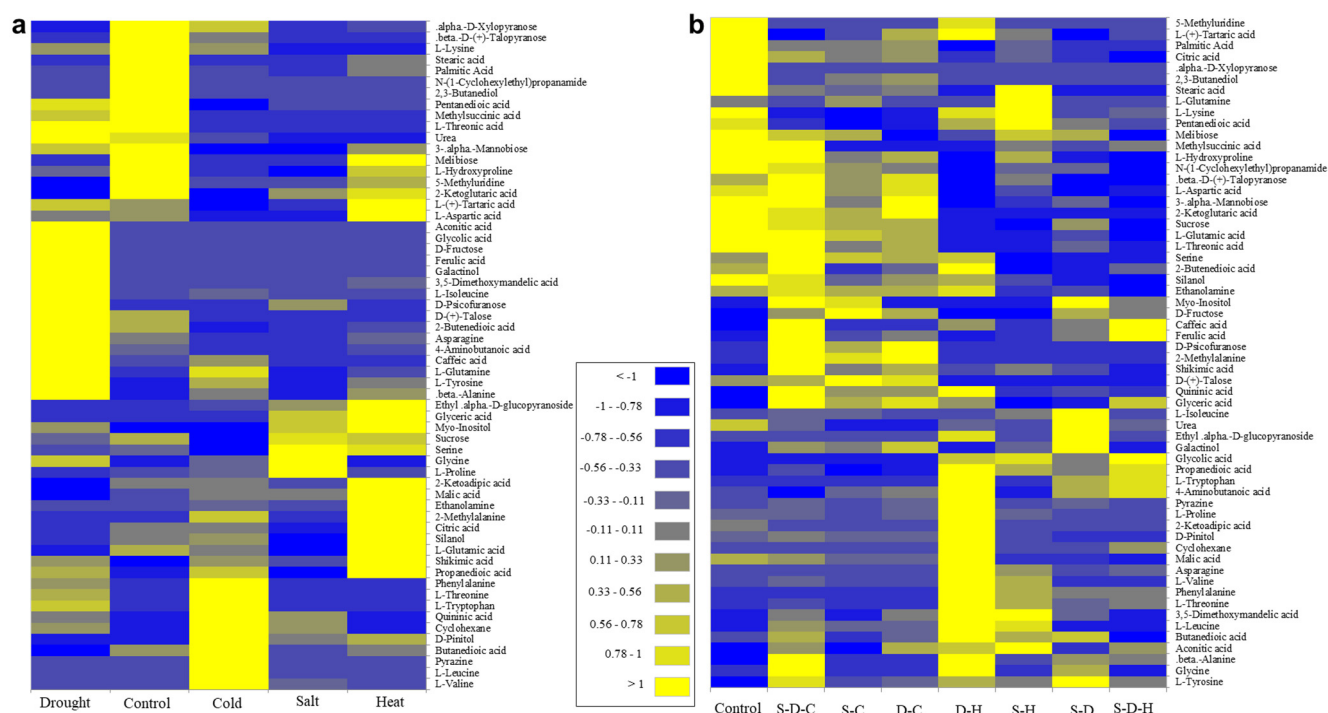

**Supplementary Figure S8.** Heat map analysis showed differential accumulation of metabolites in peanut plants treated with (a) individual and (b) combined stresses.

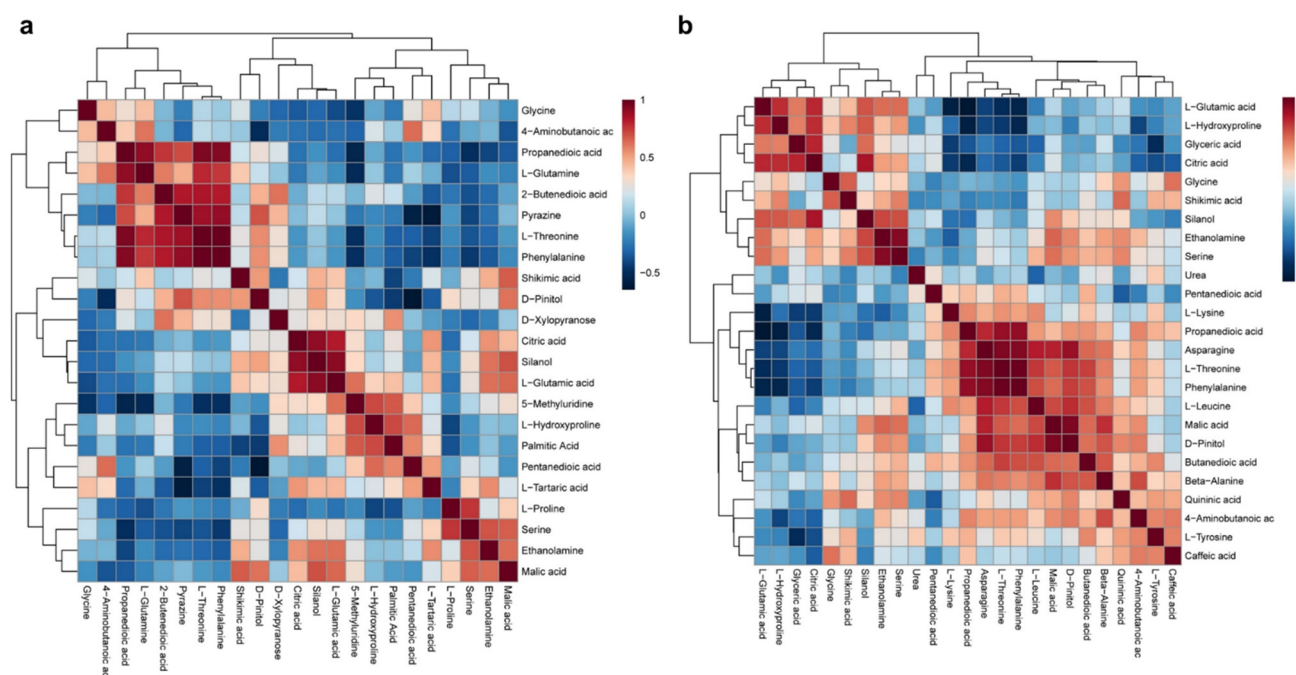

**Supplementary Figure S9.** Correlation analysis of selected metabolites in peanut treated with (a) individual and (b) combined stresses.



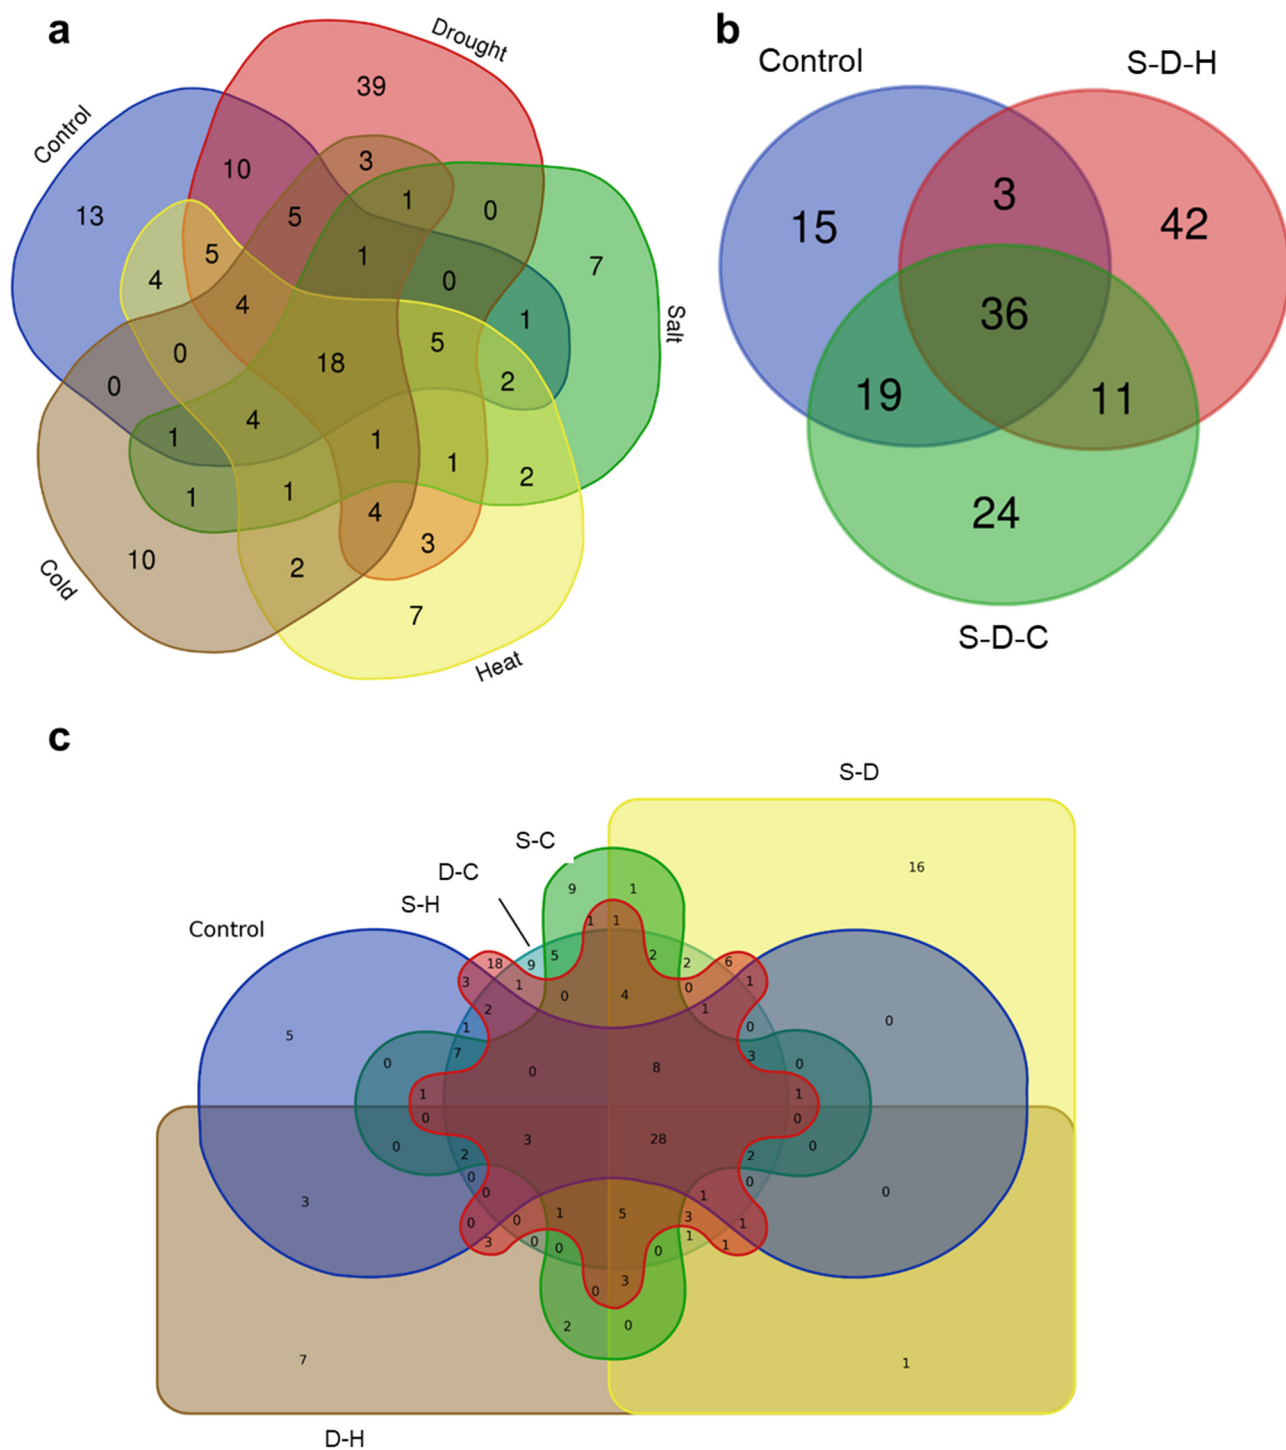

**Supplementary Figure S10.** Venn diagram of metabolites detected in peanut plants treated with (a) individual stresses, (b) two combined stresses, and (c) three combined stresses.



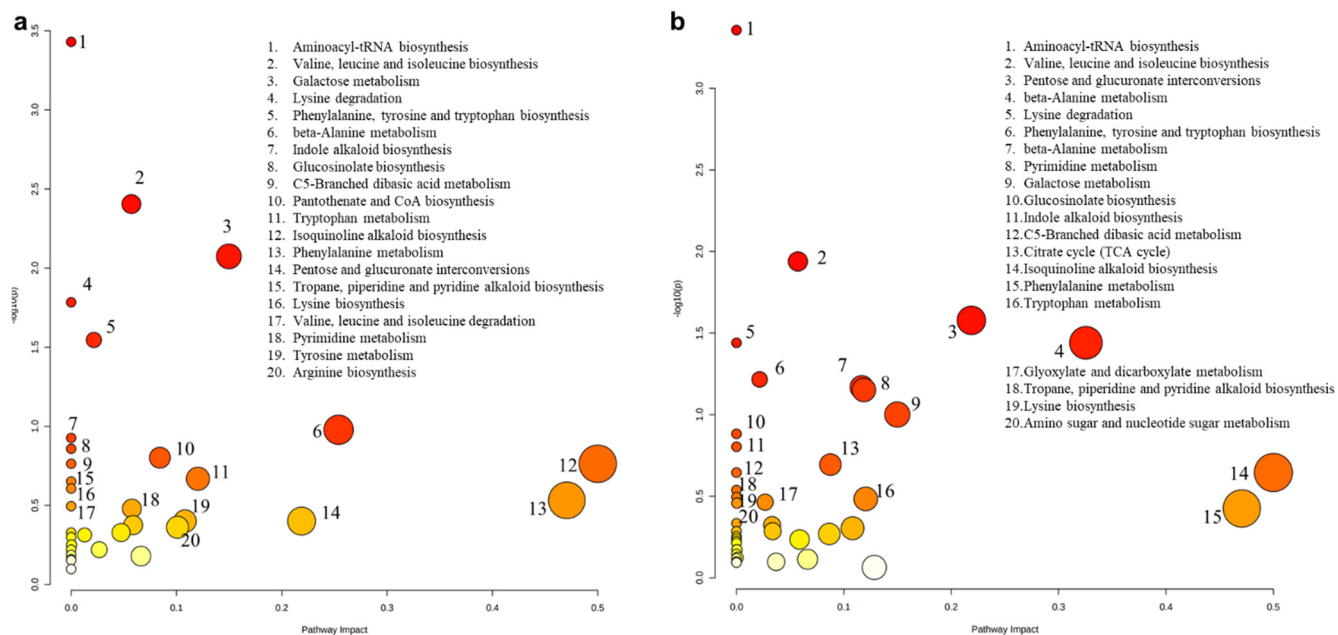

**Supplementary Figure S11.** Pathway enrichment analysis showed significantly affected metabolic pathways in peanut plants treated with (a) individual and (b) combined stresses.



**Table S1.** Correlation matrix of different physio-biochemical activities and contents observed in peanut plants treated with different individual and combined stresses.

Correlation matrix (Pearson):

| Variables                       | Proline      | ROS           | MDA          | H <sub>2</sub> O <sub>2</sub> | ABTS         | DPPH          | TPC           | TFC           | CAT           | APX           | GR           | SOD           | FAA           | PP            | Starch        | TS            | RS            | K <sup>+</sup> | Na <sup>+</sup> | Na <sup>+</sup> /K <sup>+</sup> | EL            | RW            | MSI           | TC            |
|---------------------------------|--------------|---------------|--------------|-------------------------------|--------------|---------------|---------------|---------------|---------------|---------------|--------------|---------------|---------------|---------------|---------------|---------------|---------------|----------------|-----------------|---------------------------------|---------------|---------------|---------------|---------------|
| Proline                         | <b>1</b>     | <b>0.714</b>  | 0.114        | <b>0.714</b>                  | -0.197       | -0.175        | -0.132        | -0.054        | -0.428        | -0.122        | <b>0.578</b> | 0.430         | 0.331         | <b>0.740</b>  | <b>0.658</b>  | <b>0.926</b>  | <b>0.800</b>  | <b>0.659</b>   | 0.072           | 0.082                           | 0.035         | -0.550        | 0.498         | 0.485         |
| ROS                             | <b>0.714</b> | <b>1</b>      | 0.498        | <b>1.000</b>                  | -0.324       | -0.296        | 0.086         | -0.152        | -0.565        | -0.121        | <b>0.595</b> | 0.576         | <b>0.642</b>  | <b>0.822</b>  | 0.499         | <b>0.613</b>  | <b>0.579</b>  | 0.459          | -0.172          | 0.089                           | 0.427         | <b>-0.680</b> | <b>0.632</b>  | <b>0.626</b>  |
| MDA                             | 0.114        | 0.498         | <b>1</b>     | 0.498                         | -0.137       | -0.114        | -0.068        | -0.146        | -0.474        | 0.001         | 0.470        | 0.272         | 0.560         | 0.256         | -0.074        | -0.054        | -0.090        | -0.457         | 0.357           | <b>0.702</b>                    | <b>0.832</b>  | -0.279        | <b>0.603</b>  | 0.249         |
| H <sub>2</sub> O <sub>2</sub>   | <b>0.714</b> | <b>1.000</b>  | 0.498        | <b>1</b>                      | -0.324       | -0.296        | 0.086         | -0.152        | -0.565        | -0.121        | <b>0.595</b> | 0.576         | <b>0.642</b>  | <b>0.822</b>  | 0.499         | <b>0.613</b>  | <b>0.579</b>  | 0.459          | -0.172          | 0.089                           | 0.427         | <b>-0.680</b> | <b>0.632</b>  | <b>0.626</b>  |
| ABTS                            | -0.197       | -0.324        | -0.137       | -0.324                        | <b>1</b>     | <b>0.989</b>  | -0.572        | -0.445        | -0.135        | -0.361        | -0.018       | 0.396         | -0.072        | 0.119         | 0.292         | 0.087         | 0.337         | -0.067         | -0.184          | -0.166                          | -0.237        | -0.226        | 0.159         | -0.248        |
| DPPH                            | -0.175       | -0.296        | -0.114       | -0.296                        | <b>0.989</b> | <b>1</b>      | <b>-0.660</b> | -0.535        | -0.137        | -0.308        | 0.037        | 0.413         | -0.056        | 0.140         | 0.296         | 0.111         | 0.351         | -0.051         | -0.196          | -0.153                          | -0.233        | -0.227        | 0.189         | -0.308        |
| TPC                             | -0.132       | 0.086         | -0.068       | 0.086                         | -0.572       | <b>-0.660</b> | <b>1</b>      | <b>0.872</b>  | 0.189         | 0.030         | -0.210       | -0.419        | -0.114        | -0.234        | -0.264        | -0.247        | -0.342        | 0.049          | 0.147           | -0.060                          | -0.005        | 0.223         | -0.319        | 0.458         |
| TFC                             | -0.054       | -0.152        | -0.146       | -0.152                        | -0.445       | -0.535        | <b>0.872</b>  | <b>1</b>      | 0.308         | 0.076         | -0.153       | <b>-0.596</b> | -0.342        | -0.392        | -0.278        | -0.155        | -0.323        | 0.013          | 0.479           | 0.112                           | -0.185        | 0.397         | -0.393        | 0.317         |
| CAT                             | -0.428       | -0.565        | -0.474       | -0.565                        | -0.135       | -0.137        | 0.189         | 0.308         | <b>1</b>      | 0.354         | -0.428       | <b>-0.819</b> | <b>-0.753</b> | <b>-0.655</b> | -0.402        | -0.435        | -0.460        | -0.002         | -0.068          | -0.317                          | <b>-0.602</b> | <b>0.733</b>  | <b>-0.839</b> | -0.380        |
| APX                             | -0.122       | -0.121        | 0.001        | -0.121                        | -0.361       | -0.308        | 0.030         | 0.076         | 0.354         | <b>1</b>      | 0.277        | <b>-0.579</b> | -0.469        | -0.362        | -0.220        | -0.192        | -0.327        | -0.075         | -0.066          | -0.158                          | -0.283        | 0.168         | -0.366        | 0.141         |
| GR                              | <b>0.578</b> | <b>0.595</b>  | 0.470        | <b>0.595</b>                  | -0.018       | 0.037         | -0.210        | -0.153        | -0.428        | 0.277         | <b>1</b>     | 0.243         | 0.096         | 0.434         | 0.190         | 0.500         | 0.438         | 0.294          | 0.043           | 0.107                           | 0.107         | -0.519        | 0.377         | 0.465         |
| SOD                             | 0.430        | 0.576         | 0.272        | 0.576                         | 0.396        | 0.413         | -0.419        | <b>-0.596</b> | <b>-0.819</b> | <b>-0.579</b> | 0.243        | <b>1</b>      | <b>0.762</b>  | <b>0.817</b>  | <b>0.628</b>  | 0.554         | <b>0.690</b>  | 0.239          | -0.256          | 0.077                           | 0.412         | <b>-0.744</b> | <b>0.801</b>  | 0.173         |
| FAA                             | 0.331        | <b>0.642</b>  | 0.560        | <b>0.642</b>                  | -0.072       | -0.056        | -0.114        | -0.342        | <b>-0.753</b> | -0.469        | 0.096        | <b>0.762</b>  | <b>1</b>      | <b>0.712</b>  | 0.428         | 0.300         | 0.335         | -0.117         | 0.074           | 0.437                           | <b>0.796</b>  | <b>-0.593</b> | <b>0.862</b>  | 0.171         |
| PP                              | <b>0.740</b> | <b>0.822</b>  | 0.256        | <b>0.822</b>                  | 0.119        | 0.140         | -0.234        | -0.392        | <b>-0.655</b> | -0.362        | 0.434        | <b>0.817</b>  | <b>0.712</b>  | <b>1</b>      | <b>0.834</b>  | <b>0.785</b>  | <b>0.866</b>  | 0.481          | -0.260          | -0.043                          | 0.278         | <b>-0.872</b> | <b>0.778</b>  | 0.478         |
| Starch                          | <b>0.658</b> | 0.499         | -0.074       | 0.499                         | 0.292        | 0.296         | -0.264        | -0.278        | -0.402        | -0.220        | 0.190        | <b>0.628</b>  | 0.428         | <b>0.834</b>  | <b>1</b>      | <b>0.825</b>  | <b>0.891</b>  | 0.533          | -0.222          | -0.169                          | -0.105        | <b>-0.702</b> | <b>0.597</b>  | 0.405         |
| TS                              | <b>0.926</b> | <b>0.613</b>  | -0.054       | <b>0.613</b>                  | 0.087        | 0.111         | -0.247        | -0.155        | -0.435        | -0.192        | 0.500        | 0.554         | 0.300         | <b>0.785</b>  | <b>0.825</b>  | <b>1</b>      | <b>0.933</b>  | <b>0.747</b>   | -0.032          | -0.044                          | -0.149        | <b>-0.589</b> | 0.520         | 0.392         |
| RS                              | <b>0.800</b> | <b>0.579</b>  | -0.090       | <b>0.579</b>                  | 0.337        | 0.351         | -0.342        | -0.323        | -0.460        | -0.327        | 0.438        | <b>0.690</b>  | 0.335         | <b>0.866</b>  | <b>0.891</b>  | <b>0.933</b>  | <b>1</b>      | <b>0.711</b>   | -0.263          | -0.227                          | -0.162        | <b>-0.732</b> | 0.542         | 0.387         |
| K <sup>+</sup>                  | <b>0.659</b> | 0.459         | -0.457       | 0.459                         | -0.067       | -0.051        | 0.049         | 0.013         | -0.002        | -0.075        | 0.294        | 0.239         | -0.117        | 0.481         | 0.533         | <b>0.747</b>  | <b>0.711</b>  | <b>1</b>       | -0.409          | -0.527                          | -0.541        | -0.270        | -0.024        | 0.328         |
| Na <sup>+</sup>                 | 0.072        | -0.172        | 0.357        | -0.172                        | -0.184       | -0.196        | 0.147         | 0.479         | -0.068        | -0.066        | 0.043        | -0.256        | 0.074         | -0.260        | -0.222        | -0.032        | -0.263        | -0.409         | <b>1</b>        | <b>0.850</b>                    | 0.302         | 0.367         | 0.192         | -0.167        |
| Na <sup>+</sup> /K <sup>+</sup> | 0.082        | 0.089         | <b>0.702</b> | 0.089                         | -0.166       | -0.153        | -0.060        | 0.112         | -0.317        | -0.158        | 0.107        | 0.077         | 0.437         | -0.043        | -0.169        | -0.044        | -0.227        | -0.527         | <b>0.850</b>    | <b>1</b>                        | <b>0.685</b>  | 0.170         | 0.475         | -0.177        |
| EL                              | 0.035        | 0.427         | <b>0.832</b> | 0.427                         | -0.237       | -0.233        | -0.005        | -0.185        | <b>-0.602</b> | -0.283        | 0.107        | 0.412         | <b>0.796</b>  | 0.278         | -0.105        | -0.149        | -0.162        | -0.541         | 0.302           | <b>0.685</b>                    | <b>1</b>      | -0.278        | <b>0.637</b>  | 0.100         |
| RW                              | -0.550       | <b>-0.680</b> | -0.279       | <b>-0.680</b>                 | -0.226       | -0.227        | 0.223         | 0.397         | <b>0.733</b>  | 0.168         | -0.519       | <b>-0.744</b> | <b>-0.593</b> | <b>-0.872</b> | <b>-0.702</b> | <b>-0.589</b> | <b>-0.732</b> | -0.270         | 0.367           | 0.170                           | -0.278        | <b>1</b>      | <b>-0.681</b> | <b>-0.616</b> |
| MSI                             | 0.498        | <b>0.632</b>  | <b>0.603</b> | <b>0.632</b>                  | 0.159        | 0.189         | -0.319        | -0.393        | <b>-0.839</b> | -0.366        | 0.377        | <b>0.801</b>  | <b>0.862</b>  | <b>0.778</b>  | <b>0.597</b>  | 0.520         | 0.542         | -0.024         | 0.192           | 0.475                           | <b>0.637</b>  | <b>-0.681</b> | <b>1</b>      | 0.267         |
| TC                              | 0.485        | <b>0.626</b>  | 0.249        | <b>0.626</b>                  | -0.248       | -0.308        | 0.458         | 0.317         | -0.380        | 0.141         | 0.465        | 0.173         | 0.171         | 0.478         | 0.405         | 0.392         | 0.387         | 0.328          | -0.167          | -0.177                          | 0.100         | <b>-0.616</b> | 0.267         | <b>1</b>      |

Values in bold are different from 0 with a significance level  $\alpha=0.05$

p-values (Pearson):

| Variables                     | Proline      | ROS               | MDA      | H <sub>2</sub> O <sub>2</sub> | ABTS              | DPPH              | TPC          | TFC          | CAT      | APX      | GR           | SOD          | FAA          | PP           | Starch       | TS                | RS           | K <sup>+</sup> | Na <sup>+</sup> | Na <sup>+</sup> /K <sup>+</sup> | EL           | RW           | MSI          | TC           |
|-------------------------------|--------------|-------------------|----------|-------------------------------|-------------------|-------------------|--------------|--------------|----------|----------|--------------|--------------|--------------|--------------|--------------|-------------------|--------------|----------------|-----------------|---------------------------------|--------------|--------------|--------------|--------------|
| Proline                       | <b>0</b>     | <b>0.009</b>      | 0.723    | <b>0.009</b>                  | 0.539             | 0.587             | 0.682        | 0.867        | 0.165    | 0.705    | <b>0.049</b> | 0.163        | 0.294        | <b>0.006</b> | <b>0.020</b> | <b>&lt;0.0001</b> | <b>0.002</b> | <b>0.020</b>   | 0.825           | 0.800                           | 0.913        | 0.064        | 0.100        | 0.110        |
| ROS                           | <b>0.009</b> | <b>0</b>          | 0.100    | <b>&lt;0.0001</b>             | 0.304             | 0.351             | 0.790        | 0.636        | 0.056    | 0.708    | <b>0.041</b> | 0.050        | <b>0.025</b> | <b>0.001</b> | 0.099        | <b>0.034</b>      | <b>0.049</b> | 0.133          | 0.592           | 0.783                           | 0.166        | <b>0.015</b> | <b>0.027</b> | <b>0.029</b> |
| MDA                           | 0.723        | 0.100             | <b>0</b> | 0.100                         | 0.672             | 0.724             | 0.834        | 0.651        | 0.119    | 0.998    | 0.123        | 0.393        | 0.058        | 0.421        | 0.819        | 0.868             | 0.782        | 0.136          | 0.255           | <b>0.011</b>                    | <b>0.001</b> | 0.380        | <b>0.038</b> | 0.435        |
| H <sub>2</sub> O <sub>2</sub> | <b>0.009</b> | <b>&lt;0.0001</b> | 0.100    | <b>0</b>                      | 0.304             | 0.351             | 0.790        | 0.636        | 0.056    | 0.708    | <b>0.041</b> | 0.050        | <b>0.025</b> | <b>0.001</b> | 0.099        | <b>0.034</b>      | <b>0.049</b> | 0.133          | 0.592           | 0.783                           | 0.166        | <b>0.015</b> | <b>0.027</b> | <b>0.029</b> |
| ABTS                          | 0.539        | 0.304             | 0.672    | 0.304                         | <b>0</b>          | <b>&lt;0.0001</b> | 0.052        | 0.147        | 0.676    | 0.249    | 0.956        | 0.203        | 0.824        | 0.713        | 0.358        | 0.788             | 0.284        | 0.836          | 0.567           | 0.606                           | 0.459        | 0.479        | 0.623        | 0.436        |
| DPPH                          | 0.587        | 0.351             | 0.724    | 0.351                         | <b>&lt;0.0001</b> | <b>0</b>          | <b>0.019</b> | 0.073        | 0.671    | 0.329    | 0.909        | 0.182        | 0.863        | 0.663        | 0.351        | 0.731             | 0.263        | 0.876          | 0.541           | 0.634                           | 0.466        | 0.478        | 0.556        | 0.330        |
| TPC                           | 0.682        | 0.790             | 0.834    | 0.790                         | 0.052             | <b>0.019</b>      | <b>0</b>     | <b>0.000</b> | 0.557    | 0.927    | 0.513        | 0.176        | 0.724        | 0.464        | 0.407        | 0.438             | 0.276        | 0.879          | 0.649           | 0.853                           | 0.988        | 0.487        | 0.312        | 0.135        |
| TFC                           | 0.867        | 0.636             | 0.651    | 0.636                         | 0.147             | 0.073             | <b>0.000</b> | <b>0</b>     | 0.329    | 0.814    | 0.635        | <b>0.041</b> | 0.277        | 0.207        | 0.381        | 0.631             | 0.306        | 0.968          | 0.115           | 0.728                           | 0.564        | 0.202        | 0.207        | 0.315        |
| CAT                           | 0.165        | 0.056             | 0.119    | 0.056                         | 0.676             | 0.671             | 0.557        | 0.329        | <b>0</b> | 0.258    | 0.165        | <b>0.001</b> | <b>0.005</b> | <b>0.021</b> | 0.195        | 0.157             | 0.132        | 0.996          | 0.833           | 0.315                           | <b>0.038</b> | <b>0.007</b> | <b>0.001</b> | 0.223        |
| APX                           | 0.705        | 0.708             | 0.998    | 0.708                         | 0.249             | 0.329             | 0.927        | 0.814        | 0.258    | <b>0</b> | 0.383        | <b>0.048</b> | 0.124        | 0.247        | 0.491        | 0.549             | 0.300        | 0.816          | 0.840           | 0.623                           | 0.372        | 0.602        | 0.242        | 0.663        |
| GR                            | <b>0.049</b> | <b>0.041</b>      | 0.123    | <b>0.041</b>                  | 0.956             | 0.909             | 0.513        | 0.635        | 0.165    | 0.383    | <b>0</b>     | 0.447        | 0.767        | 0.158        | 0.553        | 0.098             | 0.154        | 0.354          | 0.895           | 0.742                           | 0.740        | 0.084        | 0.227        | 0.128        |



|        |                   |              |              |              |       |       |       |              |              |              |       |              |              |              |              |                   |                   |              |              |              |              |              |              |              |
|--------|-------------------|--------------|--------------|--------------|-------|-------|-------|--------------|--------------|--------------|-------|--------------|--------------|--------------|--------------|-------------------|-------------------|--------------|--------------|--------------|--------------|--------------|--------------|--------------|
| SOD    | 0.163             | 0.050        | 0.393        | 0.050        | 0.203 | 0.182 | 0.176 | <b>0.041</b> | <b>0.001</b> | <b>0.048</b> | 0.447 | <b>0</b>     | <b>0.004</b> | <b>0.001</b> | <b>0.029</b> | 0.062             | <b>0.013</b>      | 0.455        | 0.422        | 0.813        | 0.183        | <b>0.006</b> | <b>0.002</b> | 0.590        |
| FAA    | 0.294             | <b>0.025</b> | 0.058        | <b>0.025</b> | 0.824 | 0.863 | 0.724 | 0.277        | <b>0.005</b> | 0.124        | 0.767 | <b>0.004</b> | <b>0</b>     | <b>0.009</b> | 0.165        | 0.343             | 0.288             | 0.718        | 0.819        | 0.156        | <b>0.002</b> | <b>0.042</b> | <b>0.000</b> | 0.596        |
| PP     | <b>0.006</b>      | <b>0.001</b> | 0.421        | <b>0.001</b> | 0.713 | 0.663 | 0.464 | 0.207        | <b>0.021</b> | 0.247        | 0.158 | <b>0.001</b> | <b>0.009</b> | <b>0</b>     | <b>0.001</b> | <b>0.002</b>      | <b>0.000</b>      | 0.114        | 0.414        | 0.894        | 0.382        | <b>0.000</b> | <b>0.003</b> | 0.116        |
| Starch | <b>0.020</b>      | 0.099        | 0.819        | 0.099        | 0.358 | 0.351 | 0.407 | 0.381        | 0.195        | 0.491        | 0.553 | <b>0.029</b> | 0.165        | <b>0.001</b> | <b>0</b>     | <b>0.001</b>      | <b>0.000</b>      | 0.074        | 0.488        | 0.600        | 0.746        | <b>0.011</b> | <b>0.040</b> | 0.191        |
| TS     | <b>&lt;0.0001</b> | <b>0.034</b> | 0.868        | <b>0.034</b> | 0.788 | 0.731 | 0.438 | 0.631        | 0.157        | 0.549        | 0.098 | 0.062        | 0.343        | <b>0.002</b> | <b>0.001</b> | <b>0</b>          | <b>&lt;0.0001</b> | <b>0.005</b> | 0.921        | 0.891        | 0.644        | <b>0.044</b> | 0.083        | 0.208        |
| RS     | <b>0.002</b>      | <b>0.049</b> | 0.782        | <b>0.049</b> | 0.284 | 0.263 | 0.276 | 0.306        | 0.132        | 0.300        | 0.154 | <b>0.013</b> | 0.288        | <b>0.000</b> | <b>0.000</b> | <b>&lt;0.0001</b> | <b>0</b>          | <b>0.010</b> | 0.408        | 0.479        | 0.615        | <b>0.007</b> | 0.069        | 0.215        |
| K+     | <b>0.020</b>      | 0.133        | 0.136        | 0.133        | 0.836 | 0.876 | 0.879 | 0.968        | 0.996        | 0.816        | 0.354 | 0.455        | 0.718        | 0.114        | 0.074        | <b>0.005</b>      | <b>0.010</b>      | <b>0</b>     | 0.187        | 0.078        | 0.069        | 0.396        | 0.942        | 0.299        |
| Na+    | 0.825             | 0.592        | 0.255        | 0.592        | 0.567 | 0.541 | 0.649 | 0.115        | 0.833        | 0.840        | 0.895 | 0.422        | 0.819        | 0.414        | 0.488        | 0.921             | 0.408             | 0.187        | <b>0</b>     | <b>0.000</b> | 0.339        | 0.241        | 0.549        | 0.604        |
| Na+/K+ | 0.800             | 0.783        | <b>0.011</b> | 0.783        | 0.606 | 0.634 | 0.853 | 0.728        | 0.315        | 0.623        | 0.742 | 0.813        | 0.156        | 0.894        | 0.600        | 0.891             | 0.479             | 0.078        | <b>0.000</b> | <b>0</b>     | <b>0.014</b> | 0.598        | 0.119        | 0.582        |
| EL     | 0.913             | 0.166        | <b>0.001</b> | 0.166        | 0.459 | 0.466 | 0.988 | 0.564        | <b>0.038</b> | 0.372        | 0.740 | 0.183        | <b>0.002</b> | 0.382        | 0.746        | 0.644             | 0.615             | 0.069        | 0.339        | <b>0.014</b> | <b>0</b>     | 0.382        | <b>0.026</b> | 0.758        |
| RW     | 0.064             | <b>0.015</b> | 0.380        | <b>0.015</b> | 0.479 | 0.478 | 0.487 | 0.202        | <b>0.007</b> | 0.602        | 0.084 | <b>0.006</b> | <b>0.042</b> | <b>0.000</b> | <b>0.011</b> | <b>0.044</b>      | <b>0.007</b>      | 0.396        | 0.241        | 0.598        | 0.382        | <b>0</b>     | <b>0.015</b> | <b>0.033</b> |
| MSI    | 0.100             | <b>0.027</b> | <b>0.038</b> | <b>0.027</b> | 0.623 | 0.556 | 0.312 | 0.207        | <b>0.001</b> | 0.242        | 0.227 | <b>0.002</b> | <b>0.000</b> | <b>0.003</b> | <b>0.040</b> | 0.083             | 0.069             | 0.942        | 0.549        | 0.119        | <b>0.026</b> | <b>0.015</b> | <b>0</b>     | 0.402        |
| TC     | 0.110             | <b>0.029</b> | 0.435        | <b>0.029</b> | 0.436 | 0.330 | 0.135 | 0.315        | 0.223        | 0.663        | 0.128 | 0.590        | 0.596        | 0.116        | 0.191        | 0.208             | 0.215             | 0.299        | 0.604        | 0.582        | 0.758        | <b>0.033</b> | 0.402        | <b>0</b>     |

Coefficients of determination (Pearson):

| Variables                     | Proline  | ROS      | MDA      | H <sub>2</sub> O <sub>2</sub> | ABTS     | DPPH     | TPC      | TFC      | CAT      | APX      | GR       | SOD      | FAA      | PP       | Starch   | TS       | RS       | K <sup>+</sup> | Na <sup>+</sup> | Na <sup>+</sup> /K <sup>+</sup> | EL       | RW       | MSI      | TC       |
|-------------------------------|----------|----------|----------|-------------------------------|----------|----------|----------|----------|----------|----------|----------|----------|----------|----------|----------|----------|----------|----------------|-----------------|---------------------------------|----------|----------|----------|----------|
| Proline                       | <b>1</b> | 0.510    | 0.013    | 0.510                         | 0.039    | 0.031    | 0.018    | 0.003    | 0.183    | 0.015    | 0.334    | 0.185    | 0.109    | 0.548    | 0.433    | 0.857    | 0.640    | 0.434          | 0.005           | 0.007                           | 0.001    | 0.302    | 0.248    | 0.235    |
| ROS                           | 0.510    | <b>1</b> | 0.248    | 1.000                         | 0.105    | 0.087    | 0.007    | 0.023    | 0.319    | 0.015    | 0.354    | 0.331    | 0.412    | 0.676    | 0.249    | 0.376    | 0.335    | 0.211          | 0.030           | 0.008                           | 0.183    | 0.463    | 0.400    | 0.392    |
| MDA                           | 0.013    | 0.248    | <b>1</b> | 0.248                         | 0.019    | 0.013    | 0.005    | 0.021    | 0.225    | 0.000    | 0.221    | 0.074    | 0.314    | 0.066    | 0.006    | 0.003    | 0.008    | 0.208          | 0.127           | 0.493                           | 0.692    | 0.078    | 0.364    | 0.062    |
| H <sub>2</sub> O <sub>2</sub> | 0.510    | 1.000    | 0.248    | <b>1</b>                      | 0.105    | 0.087    | 0.007    | 0.023    | 0.319    | 0.015    | 0.354    | 0.331    | 0.412    | 0.676    | 0.249    | 0.376    | 0.335    | 0.211          | 0.030           | 0.008                           | 0.183    | 0.463    | 0.400    | 0.392    |
| ABTS                          | 0.039    | 0.105    | 0.019    | 0.105                         | <b>1</b> | 0.979    | 0.327    | 0.198    | 0.018    | 0.130    | 0.000    | 0.157    | 0.005    | 0.014    | 0.085    | 0.008    | 0.114    | 0.004          | 0.034           | 0.028                           | 0.056    | 0.051    | 0.025    | 0.062    |
| DPPH                          | 0.031    | 0.087    | 0.013    | 0.087                         | 0.979    | <b>1</b> | 0.436    | 0.286    | 0.019    | 0.095    | 0.001    | 0.171    | 0.003    | 0.020    | 0.087    | 0.012    | 0.123    | 0.003          | 0.038           | 0.023                           | 0.054    | 0.052    | 0.036    | 0.095    |
| TPC                           | 0.018    | 0.007    | 0.005    | 0.007                         | 0.327    | 0.436    | <b>1</b> | 0.760    | 0.036    | 0.001    | 0.044    | 0.175    | 0.013    | 0.055    | 0.070    | 0.061    | 0.117    | 0.002          | 0.021           | 0.004                           | 0.000    | 0.050    | 0.102    | 0.210    |
| TFC                           | 0.003    | 0.023    | 0.021    | 0.023                         | 0.198    | 0.286    | 0.760    | <b>1</b> | 0.095    | 0.006    | 0.023    | 0.356    | 0.117    | 0.154    | 0.077    | 0.024    | 0.104    | 0.000          | 0.229           | 0.013                           | 0.034    | 0.157    | 0.154    | 0.101    |
| CAT                           | 0.183    | 0.319    | 0.225    | 0.319                         | 0.018    | 0.019    | 0.036    | 0.095    | <b>1</b> | 0.126    | 0.183    | 0.670    | 0.567    | 0.429    | 0.162    | 0.189    | 0.212    | 0.000          | 0.005           | 0.101                           | 0.363    | 0.537    | 0.704    | 0.144    |
| APX                           | 0.015    | 0.015    | 0.000    | 0.015                         | 0.130    | 0.095    | 0.001    | 0.006    | 0.126    | <b>1</b> | 0.077    | 0.336    | 0.220    | 0.131    | 0.049    | 0.037    | 0.107    | 0.006          | 0.004           | 0.025                           | 0.080    | 0.028    | 0.134    | 0.020    |
| GR                            | 0.334    | 0.354    | 0.221    | 0.354                         | 0.000    | 0.001    | 0.044    | 0.023    | 0.183    | 0.077    | <b>1</b> | 0.059    | 0.009    | 0.189    | 0.036    | 0.250    | 0.192    | 0.086          | 0.002           | 0.011                           | 0.011    | 0.269    | 0.142    | 0.216    |
| SOD                           | 0.185    | 0.331    | 0.074    | 0.331                         | 0.157    | 0.171    | 0.175    | 0.356    | 0.670    | 0.336    | 0.059    | <b>1</b> | 0.581    | 0.667    | 0.395    | 0.307    | 0.476    | 0.057          | 0.066           | 0.006                           | 0.170    | 0.553    | 0.642    | 0.030    |
| FAA                           | 0.109    | 0.412    | 0.314    | 0.412                         | 0.005    | 0.003    | 0.013    | 0.117    | 0.567    | 0.220    | 0.009    | 0.581    | <b>1</b> | 0.506    | 0.184    | 0.090    | 0.112    | 0.014          | 0.005           | 0.191                           | 0.634    | 0.352    | 0.743    | 0.029    |
| PP                            | 0.548    | 0.676    | 0.066    | 0.676                         | 0.014    | 0.020    | 0.055    | 0.154    | 0.429    | 0.131    | 0.189    | 0.667    | 0.506    | <b>1</b> | 0.695    | 0.617    | 0.750    | 0.231          | 0.068           | 0.002                           | 0.077    | 0.760    | 0.606    | 0.228    |
| Starch                        | 0.433    | 0.249    | 0.006    | 0.249                         | 0.085    | 0.087    | 0.070    | 0.077    | 0.162    | 0.049    | 0.036    | 0.395    | 0.184    | 0.695    | <b>1</b> | 0.681    | 0.793    | 0.284          | 0.049           | 0.028                           | 0.011    | 0.493    | 0.356    | 0.164    |
| TS                            | 0.857    | 0.376    | 0.003    | 0.376                         | 0.008    | 0.012    | 0.061    | 0.024    | 0.189    | 0.037    | 0.250    | 0.307    | 0.090    | 0.617    | 0.681    | <b>1</b> | 0.871    | 0.559          | 0.001           | 0.002                           | 0.022    | 0.347    | 0.271    | 0.154    |
| RS                            | 0.640    | 0.335    | 0.008    | 0.335                         | 0.114    | 0.123    | 0.117    | 0.104    | 0.212    | 0.107    | 0.192    | 0.476    | 0.112    | 0.750    | 0.793    | 0.871    | <b>1</b> | 0.506          | 0.069           | 0.051                           | 0.026    | 0.536    | 0.293    | 0.149    |
| K+                            | 0.434    | 0.211    | 0.208    | 0.211                         | 0.004    | 0.003    | 0.002    | 0.000    | 0.000    | 0.006    | 0.086    | 0.057    | 0.014    | 0.231    | 0.284    | 0.559    | 0.506    | <b>1</b>       | 0.167           | 0.278                           | 0.293    | 0.073    | 0.001    | 0.107    |
| Na+                           | 0.005    | 0.030    | 0.127    | 0.030                         | 0.034    | 0.038    | 0.021    | 0.229    | 0.005    | 0.004    | 0.002    | 0.066    | 0.005    | 0.068    | 0.049    | 0.001    | 0.069    | 0.167          | <b>1</b>        | 0.723                           | 0.091    | 0.134    | 0.037    | 0.028    |
| Na+/K+                        | 0.007    | 0.008    | 0.493    | 0.008                         | 0.028    | 0.023    | 0.004    | 0.013    | 0.101    | 0.025    | 0.011    | 0.006    | 0.191    | 0.002    | 0.028    | 0.002    | 0.051    | 0.278          | 0.723           | <b>1</b>                        | 0.469    | 0.029    | 0.225    | 0.031    |
| EL                            | 0.001    | 0.183    | 0.692    | 0.183                         | 0.056    | 0.054    | 0.000    | 0.034    | 0.363    | 0.080    | 0.011    | 0.170    | 0.634    | 0.077    | 0.011    | 0.022    | 0.026    | 0.293          | 0.091           | 0.469                           | <b>1</b> | 0.077    | 0.406    | 0.010    |
| RW                            | 0.302    | 0.463    | 0.078    | 0.463                         | 0.051    | 0.052    | 0.050    | 0.157    | 0.537    | 0.028    | 0.269    | 0.553    | 0.352    | 0.760    | 0.493    | 0.347    | 0.536    | 0.073          | 0.134           | 0.029                           | 0.077    | <b>1</b> | 0.464    | 0.380    |
| MSI                           | 0.248    | 0.400    | 0.364    | 0.400                         | 0.025    | 0.036    | 0.102    | 0.154    | 0.704    | 0.134    | 0.142    | 0.642    | 0.743    | 0.606    | 0.356    | 0.271    | 0.293    | 0.001          | 0.037           | 0.225                           | 0.406    | 0.464    | <b>1</b> | 0.071    |
| TC                            | 0.235    | 0.392    | 0.062    | 0.392                         | 0.062    | 0.095    | 0.210    | 0.101    | 0.144    | 0.020    | 0.216    | 0.030    | 0.029    | 0.228    | 0.164    | 0.154    | 0.149    | 0.107          | 0.028           | 0.031                           | 0.010    | 0.380    | 0.071    | <b>1</b> |



**Table S2.** Different abiotic stress conditions in which peanut plants were subjected for 48 h.

| S. No. | Stress conditions           | Code <sup>#</sup> | Media and supplement              |
|--------|-----------------------------|-------------------|-----------------------------------|
| 1.     | Control (no stress)         | Control           | MSB (pH 5.8)                      |
| 2..    | Salinity                    | Salinity          | MSB + 200 Mm NaCl                 |
| 3.     | Drought                     | Drought           | MSB + 10% PEG                     |
| 4.     | Heat                        | Heat              | MSB + 45°C                        |
| 5.     | Cold                        | Cold              | MSB + 4°C                         |
| 6.     | Salinity and Drought        | S-D               | MSB + 200 mM NaCl +10% PEG        |
| 7.     | Salinity and Heat           | S-H               | MSB + 200 mM NaCl + 45°C          |
| 8.     | Salinity and Cold           | S-C               | MSB + 200 mM NaCl + 4°C           |
| 9.     | Drought and Heat            | D-H               | MSB +10% PEG + 45°C               |
| 10.    | Drought and Cold            | D-C               | MSB +10% PEG + 4°C                |
| 11.    | Salinity, Drought, and Heat | S-D-H             | MSB + 200 mM NaCl +10% PEG + 45°C |
| 12.    | Salinity, Drought, and Cold | S-D-C             | MSB + 200 mM NaCl +10% PEG + 4°C  |

<sup>#</sup> Codes used in the study

MSB: Murashige and Skoog Basal Medium

PEG: Polyethylene glycol

**Table S3.** Primers and PCR conditions used for the expression analysis of antioxidant encoding genes using real time PCR.

| Genes                | Primer code | Orientation | Sequence (5'-3')       | PCR conditions <sup>^</sup>           |
|----------------------|-------------|-------------|------------------------|---------------------------------------|
| Ascorbate peroxidase | AhAPX-F     | Forward     | TGCTGGAACCTTTTGATGTGG  | 1 cycle<br>95°C, 5 min                |
|                      | AhAPX-R     | Reverse     | AACTACACCGGCCAACTG     |                                       |
| Catalase             | AhCAT-F     | Forward     | TTTTACACCAGAGAGGGTAACT | 40 cycles<br>95°C, 10 s<br>60°C, 30 s |
|                      | AhCAT-R     | Reverse     | AGGATCCTCCAATTCTCCTGG  |                                       |
| Superoxide dismutase | AhSOD-F     | Forward     | CAGTTCTTAGCAGCAGTGAG   | Melt curve analysis                   |
|                      | AhSOD-R     | Reverse     | GGAACCCATGAAGACCAG     |                                       |
| Actin                | AhACT-F     | Forward     | CGGGATGGAATCTCCTGGA    |                                       |
|                      | AhACT-R     | Reverse     | CATGCTACTCGGTGCCAATG   |                                       |

<sup>^</sup> PCR conditions are same for all
